# Supplementary material
Source: PubMed Central journal article supplement (PMC3991984)
Supplement: Supp_Table1.pdf [file Supp_Table1.pdf]

## Supplementary Data

SUPPLEMENTARY TABLE S1. DNase I CONTROL  
DIGESTIONS FOR SELF-COMPLEMENTARY AAV VECTORS

| <i>Vector lot no.</i> | <i>GC/ml ratio:<br/>-/+ DNase I</i> |
|-----------------------|-------------------------------------|
| V1258                 | 1.03                                |
| V1306                 | 0.98                                |
| V1450                 | 0.93                                |
| WL005                 | 1.13                                |
| WL426-7               | 0.94                                |

GC, genome copies.
